# Supplementary material
Source: ML conference proceedings conference paper supplement (https://proceedings.neurips.cc/paper_files/paper/2021/hash/5907c88df2965e500c98e948dfae20c0-Abstract.html)
Supplement: Supplementary file 1 [file 5907c88df2965e500c98e948dfae20c0-Supplemental.pdf]

## A Technical Results

In this section, it will be convenient to adopt the ESI notation [29]:

**Definition 12** (Exponential Stochastic Inequality (ESI) notation). *Let  $(\Omega, \mathcal{F}, \mathbf{P})$  be a probability space. Further, let  $X, Y$  be any two random variables and  $\mathcal{G}$  be a sub- $\sigma$ -algebra of  $\mathcal{F}$ . For  $\eta > 0$ , we define*

$$X \triangleq_{\eta}^{\mathcal{G}} Y \iff X - Y \triangleq_{\eta}^{\mathcal{G}} 0 \iff \mathbf{E}[e^{\eta(X-Y)} | \mathcal{G}] \leq 1.$$

For  $\mathcal{G} = \mathcal{F}$ , we simply write  $\triangleq_{\eta}$  instead of  $\triangleq_{\eta}^{\mathcal{G}}$ . In what follows, given random variables  $Z_1, Z_2, \dots$  and loss  $\ell$  satisfying Assumption 1, we denote by

$$X_i^h := \ell(h, Z_i) - \ell(h_*, Z_i), \quad h \in \mathcal{H}, i \in \mathbb{N},$$

the excess-loss random variable, where  $h_* \in \arg \inf_{h \in \mathcal{H}} L(h)$  (with  $L$  as in Assumption 1). Let

$$\Phi_{i,\eta} := \frac{1}{\eta} \ln \mathbf{E}_{i-1} [e^{-\eta X_i^h}] = \frac{1}{\eta} \ln \mathbf{E} [e^{-\eta X_i^h} | Z_1, \dots, Z_{i-1}] \quad (13)$$

be the (conditional) *normalized cumulant generating function* of  $X_i^h$ . We note that since the loss  $\ell$  takes values in the interval  $[0, 1]$ , we have

$$X_i^h \in [-1, 1], \quad \text{for all } h \in \mathcal{H}, \text{ a.s.}$$

We now present some existing results pertaining to the excess-loss random variable  $X_i^h$  and its normalized cumulant generating function, which will be useful in our proofs:

**Lemma 13** ([29]). *Let  $h \in \mathcal{H}$  and  $i \in \mathbb{N}$ . Further, let  $X_i^h$ , and  $\Phi_{i,\eta}$  be as above. Then, for all  $\eta \geq 0$ ,*

$$\alpha_{\eta} \cdot (X_i^h)^2 - X_i^h(Z) \triangleq_{\eta}^{\mathcal{G}_{i-1}} \Phi_{i,2\eta} + \alpha_{\eta} \cdot \Phi_{i,2\eta}^2, \quad \text{where } \alpha_{\eta} := \frac{\eta}{1 + \sqrt{1 + 4\eta^2}},$$

and  $\mathcal{G}_{i-1}$  is the  $\sigma$ -algebra generated by  $Z_1, \dots, Z_{i-1}$ .

**Lemma 14** ([29]). *If the  $(\beta, B)$ -Bernstein condition (Definition 3) holds for  $(\beta, B) \in [0, 1] \times \mathbb{R}_{>0}$ , then for  $\Phi_{i,\eta}$  as in (13), it holds that*

$$\Phi_{i,\eta} \leq (B\eta)^{\frac{1}{1-\beta}}, \quad \text{for all } \eta \in (0, 1], i \geq 1.$$

**Lemma 15** ([10]). *For  $\Phi_{i,\eta}$  as in (13), it holds that*

$$\Phi_{i,\eta} \leq \frac{\eta}{2}, \quad \text{for all } \eta \in \mathbb{R}, i \geq 1.$$

**Lemma 16** ([10]). *For  $i \geq 1$  and  $h \in \mathcal{H}$ , the excess-loss random variable  $X_i^h$  satisfies*

$$X_i^h - \mathbf{E}_{i-1}[X_i^h] \triangleq_{\eta}^{\mathcal{G}_{i-1}} \eta \cdot \mathbf{E}_{i-1}[(X_i^h)^2], \quad \text{for all } \eta \in [0, 1],$$

where  $\mathcal{G}_{i-1}$  is the  $\sigma$ -algebra generated by  $Z_1, \dots, Z_{i-1}$  and  $\mathbf{E}_{i-1}[\cdot] := \mathbf{E}[\cdot | \mathcal{G}_{i-1}]$ .

The following useful proposition is imported from [38] with minor modifications:

**Proposition 17. [ESI Transitivity]** *Let  $(\Omega, \mathcal{F}, \mathbf{P})$  be a probability space and  $\mathcal{G}$  be a sub- $\sigma$ -algebra of  $\mathcal{F}$ . Further, let  $Z_1, \dots, Z_n$  be random variables such that for  $(\gamma_i)_{i \in [n]} \in (0, +\infty)^n$ ,  $Z_i \triangleq_{\gamma_i}^{\mathcal{G}} 0$ , for all  $i \in [n]$ . Then*

$$\sum_{i=1}^n Z_i \triangleq_{\nu_n}^{\mathcal{G}} 0, \quad \text{where } \nu_n := \left( \sum_{i=1}^n \frac{1}{\gamma_i} \right)^{-1}.$$

To prove our time-uniform concentration inequality in Section 3, we will require the following generalization of Markov's inequality (we state the version found in [27]):

**Lemma 18** (Ville's inequality). *If  $(M_n)_{n \geq 0}$  is a non-negative supermartingale, then for any  $a > 0$ ,*

$$\mathbf{P}[\exists n \geq 1 : M_n \geq a] \leq \frac{M_0}{a}.$$

The upcoming lemmas will help us bound the sequence of gaps  $(\xi_k)$  in (9) under the Bernstein condition.

**Lemma 19.** *Let  $P_0 \in \Delta(\mathcal{H})$ ,  $\beta \in [0, 1]$  and  $B > 0$ , and suppose that the  $(\beta, B)$ -Bernstein condition holds. Then, under Assumption 1, for any  $\eta \in [0, 1/2]$  and  $\delta \in (0, 1)$ , with probability at least  $1 - \delta$ ,*

$$\frac{\eta}{n} \sum_{i=1}^n \mathbf{E}_{Q(h)} [(\ell(h, Z_i) - \ell(h_*, Z_i))^2] \leq 8(L(Q) - L(h_*)) + 4C_\beta \cdot \eta^{\frac{1}{1-\beta}} + \frac{8(\text{KL}(Q\|P_0) + \ln \delta^{-1})}{n\eta}, \quad (14)$$

for all  $n \geq 1$ , where  $h_* \in \arg \inf_{h \in \mathcal{H}} L(h)$  and  $C_\beta := ((1 - \beta)^{1-\beta} \beta^\beta)^{\frac{\beta}{1-\beta}} + 3/2(2B)^{\frac{1}{1-\beta}}$ .

**Proof of Lemma 19.** Let  $\delta \in (0, 1)$  and define  $X_i^h := \ell(h, Z_i) - \ell(h_*, Z_i)$ . We recall that  $\mathcal{G}_i$  is the  $\sigma$ -algebra generated by  $Z_1, \dots, Z_i$ , and  $\mathbf{E}_{i-1}[\cdot] := \mathbf{E}[\cdot | \mathcal{G}_{i-1}]$ . Note that under Assumption 1,  $\mathbf{E}_{i-1}[X_i^h] = L(h) - L(h_*)$ , for all  $i \geq 1$  and  $h \in \mathcal{H}$ . For any  $\eta \in [0, 1/2]$  and  $h \in \mathcal{H}$  our strategy is to show that, under the  $(\beta, B)$ -Bernstein condition,

$$M_n^h := \exp \left( \eta^2 \sum_{i=1}^n (X_i^h)^2 / 8 - n\eta \cdot (L(h) - L(h_*)) + nC_\beta \cdot \eta^{\frac{2-\beta}{1-\beta}} / 2 \right), \quad (15)$$

is a non-negative supermartingale, for all  $h \in \mathcal{H}$ . After that, invoking Ville's inequality (Lemma 18) and applying a change of measure argument (Lemma 21), we get the desired result.

Under the  $(\beta, B)$ -Bernstein condition, Lemmas 13-15 imply, for all  $\eta \in [0, 1/2]$  and  $i \geq 1$ ,

$$\eta \cdot (X_i^h)^2 / 4 \leq_{\mathcal{G}_{i-1}} X_i^h + 3/2(2B\eta)^{\frac{1}{1-\beta}}, \quad (16)$$

where we used the fact that  $\alpha_\eta = \frac{\eta}{1 + \sqrt{1 + 4\eta^2}} \geq \eta/4$ , for all  $0 \leq \eta \leq 1/2$  ( $\alpha_\eta$  is involved in Lemma 13).

Now, due to the Bernstein inequality (Lemma 16), we have for all  $\eta \in [0, 1/2]$  and  $i \geq 1$ ,

$$\begin{aligned} X_i^h &\leq_{\mathcal{G}_{i-1}} L(h) - L(h_*) + \eta \cdot \mathbf{E}_{i-1}[(X_i^h)^2], \\ &\leq_{\mathcal{G}_{i-1}} L(h) - L(h_*) + \eta \cdot (L(h) - L(h_*))^\beta, \quad (\text{by the Bern. cond. \& Assumption 1}) \\ &\leq_{\mathcal{G}_{i-1}} 2(L(h) - L(h_*)) + c_\beta^{\frac{\beta}{1-\beta}} \cdot \eta^{\frac{1}{1-\beta}}, \quad \text{where } c_\beta := (1 - \beta)^{1-\beta} \beta^\beta. \end{aligned} \quad (17)$$

The last inequality follows by the fact that  $z^\beta = c_\beta \cdot \inf_{\nu > 0} \{z/\nu + \nu^{\frac{\beta}{1-\beta}}\}$ , for  $z \geq 0$  (in our case, we set  $\nu = c_\beta \eta$  to get to (17)). By chaining (16) with (17) using Proposition 17, we get:

$$\begin{aligned} \eta \cdot (X_i^h)^2 / 4 &\leq_{\mathcal{G}_{i-1}} \frac{\eta}{2} 2(L(h) - L(h_*)) + c_\beta^{\frac{\beta}{1-\beta}} \cdot \eta^{\frac{1}{1-\beta}} + 3/2(2B\eta)^{\frac{1}{1-\beta}}. \\ &\leq_{\mathcal{G}_{i-1}} \frac{\eta}{2} 2(L(h) - L(h_*)) + C_\beta \cdot \eta^{\frac{1}{1-\beta}}. \end{aligned} \quad (18)$$

This implies that  $M_n^h$  in (15) is a non-negative supermartingale. This in turn implies that for any distribution  $P_0$ ,  $\mathbf{E}_{P_0(h)}[M_n^h]$  is also a supermartingale. Thus, by Ville's inequality (Lemma 18), we have, for any  $\delta \in (0, 1)$ ,

$$\delta \geq \mathbf{P} [\exists n \geq 1, \mathbf{E}_{P_0(h)}[M_n^h] \geq \delta^{-1}], \quad (19)$$

On the other hand, by the KL-change of measure lemma (Lemma 21), we have for all  $Q \in \Delta(\mathcal{H})$

$$\mathbf{E}_{Q(h)}[\ln M_n^h] \leq \text{KL}(Q\|P_0) + \mathbf{E}_{P_0(h)}[M_n^h].$$

Combining this with (19), we get the desired result.  $\square$

**Lemma 20.** *For  $A, B > 0$ , we have*

$$\inf_{\eta \in (0, 1/2)} \left\{ A\eta^{\frac{1}{1-\beta}} + B/\eta \right\} \leq \frac{A(3-2\beta)}{1-\beta} \left( \frac{(1-\beta)B}{A} \right)^{\frac{1}{2-\beta}} + 2B. \quad (20)$$

*Proof.* The unconstrained minimizer of the LHS of (20) is given by  $\eta_* := \left(\frac{(1-\beta)B}{A}\right)^{\frac{1-\beta}{2-\beta}}$ . If  $\eta_* \leq 1/2$ , then

$$\inf_{\eta \in (0, 1/2]} \left\{ A\eta^{\frac{1}{1-\beta}} + B/\eta \right\} \leq A\eta_*^{\frac{1}{1-\beta}} + B/\eta_* = \frac{A(2-\beta)}{1-\beta} \left( \frac{(1-\beta)B}{A} \right)^{\frac{1}{2-\beta}}. \quad (21)$$

Now if  $\eta_* > 1/2$ , we have  $(1/2)^{\frac{1}{1-\beta}} < \left(\frac{(1-\beta)B}{A}\right)^{\frac{1}{2-\beta}}$ , and so, we have

$$\begin{aligned} \inf_{\eta \in (0, 1/2]} \left\{ A\eta^{\frac{1}{1-\beta}} + B/\eta \right\} &\leq A(1/2)^{\frac{1}{1-\beta}} + 2B, \\ &\leq A \left( \frac{(1-\beta)B}{A} \right)^{\frac{1}{2-\beta}} + 2B. \end{aligned} \quad (22)$$

By combining (21) and (22) we get the desired result.  $\square$

We need one more classical change of measure result (see e.g. [1]):

**Lemma 21 (KL-change of measure).** *For all distributions  $P$  and  $Q$  such that  $Q \ll P$ , it holds that*

$$\mathbf{E}_Q[X] \leq \inf_{\eta > 0} \left\{ \eta \text{KL}(Q \| P) + \eta^{-1} \ln \mathbf{E}_P [e^{\eta X}] \right\}.$$

## B Proofs of the New Concentration Inequalities

To prove our first concentration inequality for MDS in Proposition 5, we start by constructing a non-negative supermartingale with the help of the recent FREEGRAD algorithm [39]. As mentioned in the introduction, our proof technique is similar to the one introduced in [28] with the difference that we use the specific shape of FREEGRAD's potential function to build our supermartingale. Using the latter leads to a desirable empirical variance term in our final concentration bound.

To express the FREEGRAD supermartingale, we define

$$\Phi_\gamma(S, Q) := \frac{\gamma}{\sqrt{\gamma^2 + Q}} \cdot \exp\left(\frac{|S|^2}{2\gamma^2 + 2Q + 2|S|}\right), \quad S, Q \geq 0, \gamma > 0. \quad (23)$$

**Proposition 22.** *Let  $\gamma > 0$  and  $(\mathcal{F}_t)_{t \in \mathbb{N}}$  be a filtration. For any random variables  $X_1, X_2, \dots \in [-1, 1]$  s.t.  $X_i$  is  $\mathcal{F}_i$ -measurable and  $\mathbf{E}[X_i | \mathcal{F}_{i-1}] = 0$ , for all  $i \in [n]$ , the process  $(\Phi_\gamma(S_n, Q_n))$ , where  $S_n := \sum_{i=1}^n X_i$  and  $Q_n := \sum_{i=1}^n X_i^2$  is a non-negative supermartingale w.r.t.  $(\mathcal{F}_t)_{t \in \mathbb{N}}$ ; that is,*

$$\Phi_\gamma(S_n, Q_n) \geq 0, \quad \text{and} \quad \mathbf{E}[\Phi_\gamma(S_{n+1}, Q_{n+1}) | \mathcal{F}_n] \leq \Phi_\gamma(S_n, Q_n), \quad \text{for all } n \geq 1.$$

As mentioned above, the proof of the proposition is based on the guarantee of the parameter-free online learning algorithm FREEGRAD. The algorithm operates in rounds, where at each round  $t$ , FREEGRAD outputs  $\widehat{\mathbf{w}}_t$  (that is a deterministic function of the past) in some convex set  $\mathcal{W}$ , say  $\mathbb{R}^d$ , then observes a vector  $\mathbf{g}_t \in \mathbb{R}^d$ , typically the sub-gradient of a loss function at round  $t$ . The algorithm guarantees a regret bound of the form  $\sum_{t=1}^T \mathbf{g}_t^\top (\widehat{\mathbf{w}}_t - \mathbf{w}) \leq \widetilde{O}(\|\mathbf{w}\| \sqrt{Q_T})$ , for all  $\mathbf{w} \in \mathcal{W}$ , where  $Q_T := \sum_{t=1}^T \|\mathbf{g}_t\|^2$ . What is more, FREEGRAD's outputs  $(\widehat{\mathbf{w}}_t)$  ensure the following (see [39, Theorem 5]):

$$\widehat{\mathbf{w}}_t^\top \mathbf{g}_t + \Phi_\gamma(S_t, Q_t) \leq \Phi_\gamma(S_{t-1}, Q_{t-1}), \quad (24)$$

where  $S_t := \|\sum_{i=1}^t \mathbf{g}_i\|$  and  $Q_t := \sum_{i=1}^t \|\mathbf{g}_i\|^2$ . In the proof of Proposition 22, we will reason about the outputs of FREEGRAD in one dimension (i.e.  $d = 1$ ) in response to the inputs  $(\mathbf{g}_t) \equiv (X_t)$ .

One way to prove Proposition 22 is to show that FREEGRAD is a betting algorithm that bets fractions smaller than one of its current wealth at each round. In this case, Proposition 22 would follow from existing results due to, for example, [28]. However, for the sake of simplicity, we decided to present a proof that does not explicitly refer to bets.

**Proof of Proposition 22.** By [39, Theorem 5 and proof of Theorem 20], FREEGRAD's outputs  $(\widehat{w}_i)$  in response to  $(X_i)$  and parameter  $\gamma > 0$  (playing the role of  $1/\epsilon$  in their Theorem 20) guarantee<sup>8</sup>,

$$\widehat{w}_{n+1} \cdot X_{n+1} + \Phi_\gamma(S_{n+1}, Q_{n+1}) \leq \Phi_\gamma(S_n, Q_n), \quad \text{for all } n \in \mathbb{N},$$

Re-arranging this inequality and taking the expectation  $\mathbf{E}[\cdot | \mathcal{F}_n]$  yields

$$\mathbf{E}[\Phi_\gamma(S_{n+1}, Q_{n+1}) - \Phi_\gamma(S_n, Q_n) | \mathcal{F}_n] \leq -\mathbf{E}[\widehat{w}_{n+1} \cdot X_{n+1} | \mathcal{F}_n] = -\widehat{w}_{n+1} \cdot \mathbf{E}[X_{n+1} | \mathcal{F}_n] = 0,$$

where the penultimate equality follows by the fact that  $\widehat{w}_{n+1}$  is a deterministic function of the history up to round  $n$ , and so it is  $\mathcal{F}_n$ -measurable. Finally, the last equality follows by the assumption that  $\mathbf{E}[X_{n+1} | \mathcal{F}_n] = 0$ .  $\square$

Next, using standard tools from PAC-Bayesian analyses, we extend the result of Proposition 22 by allowing the random variables  $(X_t)$  to depend on  $h \in \mathcal{H}$ . We will also “mix” over the free parameter  $\gamma$  to obtain the optimal (doubly-logarithmic) dependence in  $n$  in our final concentration bounds.

**Proposition 23.** *Let  $(\mathcal{F}_t)_{t \in \mathbb{N}}$  be a filtration and  $\{X_t^h\}$  be a family of random variables in  $[-1, 1]$  s.t.  $X_t^h$  is  $\mathcal{F}_t$ -measurable and  $\mathbf{E}[X_t^h | \mathcal{F}_{t-1}] = 0$ , for all  $t \geq 1$  and  $h \in \mathcal{H}$ . Further, let  $\pi$  and  $P_0$  be prior distributions on  $\mathbb{R}_{>0}$  and  $\mathcal{H}$ , respectively. Then, for any  $\delta \in (0, 1)$ , we have*

$$\mathbf{P}[\forall n \geq 1, \forall P \in \Delta(\mathcal{H}), \mathbf{E}_{P(h)}[\ln \mathbf{E}_{\pi(\gamma)}[\Phi_\gamma(S_n^h, Q_n^h)]] \leq \text{KL}(P \| P_0) + \ln(1/\delta)] \geq 1 - \delta,$$

where  $S_n^h := \sum_{i=1}^n X_i^h$  and  $Q_n^h := \sum_{i=1}^n (X_i^h)^2$ .

**Proof of Proposition 23.** By the KL-change of measure lemma (Lemma 21), we have

$$\mathbf{E}_{P(h)}[\ln \mathbf{E}_{\pi(\gamma)}[\Phi_\gamma(S_n^h, Q_n^h)]] \leq \text{KL}(P \| P_0) + \ln \mathbf{E}_{P_0(h)} \mathbf{E}_{\pi(\gamma)}[\Phi_\gamma(S_n^h, Q_n^h)], \quad (25)$$

for all  $n \geq 1$  and  $P \in \Delta(\mathcal{H})$ . On the other hand, by Proposition 22, we know that the process  $(\Phi_\gamma(S_n^h, Q_n^h))$  is a supermartingale for any  $\gamma > 0$ . This in turn implies that  $(\mathbf{E}_{P_0(h)} \mathbf{E}_{\pi(\gamma)}[\Phi_\gamma(S_n^h, Q_n^h)])_n$  is also a non-negative supermartingale, since a mixture of supermartingales is also a supermartingale. Now, by Ville's inequality (Lemma 18), we have, for all  $\delta \in (0, 1)$ ,

$$\mathbf{P}[\forall n \geq 1, \mathbf{E}_{P_0(h)} \mathbf{E}_{\pi(\gamma)}[\Phi_\gamma(S_n^h, Q_n^h)] \leq 1/\delta] \geq 1 - \delta.$$

By combining this inequality with (25), we obtain the desired result.  $\square$

We now use Proposition 23 to prove Proposition 5 (some of the steps in the next proof are similar to ones found in [28]):

**Proof of Proposition 5.** Let  $\rho > 1$  and  $Q_n^h := \sum_{i=1}^n (X_i^h)^2$ . We will apply Proposition 23 with a specific choice of prior  $\pi$ . In particular, we let  $\pi$  be a prior on  $\{\rho^{k/2} : k \geq 1\}$ , such that for  $k \geq 1$ ,

$$\pi(\rho^{k/2}) := \pi_k := \frac{1}{ck \ln^2(k+1)},$$

where  $c$  is as in (4). For  $n \geq 1$  and  $h \in \mathcal{H}$ , let  $k_n \geq 1$  be such that

$$\rho^{k_n-1} \leq 1 \vee Q_n^h \leq \rho^{k_n}. \quad (26)$$

Note that  $k_n$  is guaranteed to exist and (26) implies that  $k_n \leq \ln_\rho(1 \vee Q_n^h) + 1 \leq \ln_\rho(n) + 1$ . Let  $\gamma_n := \rho^{k_n/2}$ . With our choice of  $\pi$ , we have, for all  $h \in \mathcal{H}$ ,

$$\ln \mathbf{E}_{\pi(\gamma)}[\Phi_\gamma(S_n^h, Q_n^h)] \geq \ln \Phi_{\gamma_n}(S_n^h, Q_n^h) + \ln \pi(\gamma_n),$$

$$\geq \frac{|S_n^h|^2}{2\gamma_n + 2Q_n^h + 2|S_n^h|} + \ln \left( \frac{\gamma_n}{\sqrt{\gamma_n^2 + Q_n^h}} \right) + \ln \pi(\gamma_n),$$

$$\geq \frac{|S_n^h|^2}{2(\rho+1)(1 \vee Q_n^h) + 2|S_n^h|} - \ln \sqrt{\rho+1} + \ln \pi(\gamma_n), \quad (27)$$

$$\geq \frac{|S_n^h|^2}{2(\rho+1)V_n^h + 2|S_n^h|} - \ln \left( c\sqrt{\rho+1}(\ln_\rho(n) + 1) \ln^2(\ln_\rho(n) + 2) \right), \quad (28)$$

$$= 4 \sup_{\eta \geq 0} \{ \eta |S_n^h| - 2\eta^2(\rho+1)V_n^h - 2\eta^2 |S_n^h| \} - \ln \phi_\rho(n), \quad (29)$$

<sup>8</sup>Technically, FREEGRAD also requires a sequence of hints  $(h_t)$  that provides upper bounds on  $(|X_t|)$ . Since  $X_i \in [-1, 1]$ , these hints can all be set to 1.

where in (27) we used (26) and in (28) we used the fact that  $k_n \leq 1 + \ln_\rho(n)$ . Now, by an application of Jensen's inequality, we get from (29) that

$$\begin{aligned} \mathbf{E}_{P(h)} \left[ \ln \mathbf{E}_{\pi(\gamma)} \left[ \Phi_\gamma(S_n^h, Q_n^h) \right] \right] &\geq 4 \sup_{\eta \geq 0} \{ \eta \mathbf{E}_{P(h)} |S_n^h| - 2\eta^2(\rho+1) \mathbf{E}_{P(h)} [V_n^h] - 2\eta^2 \mathbf{E}_{P(h)} |S_n^h| \} \\ &\quad - \ln \phi_\rho(n), \\ &= \frac{(\mathbf{E}_{P(h)} |S_n^h|)^2}{2(\rho+1) \mathbf{E}_{P(h)} [V_n^h] + 2 \mathbf{E}_{P(h)} |S_n^h|} - \ln \phi_\rho(n). \end{aligned}$$

Thus, we have  $\mathbf{E}_{P(h)} \left[ \ln \mathbf{E}_{\pi(\gamma)} \left[ \Phi_\gamma(S_n^h, Q_n^h) \right] \right] \leq \text{KL}(P \| P_0) + \ln(1/\delta)$  only if

$$\frac{(\mathbf{E}_{P(h)} [|S_n^h|])^2}{2(\rho+1) \mathbf{E}_{P(h)} [V_n^h] + 2 \mathbf{E}_{P(h)} [|S_n^h|]} \leq C_n(P) := \text{KL}(P \| P_0) + \ln \frac{\phi_\rho(n)}{\delta}.$$

Combining this fact with Proposition 23 implies the desired result.  $\square$

**Proof of Theorem 6.** We will apply Proposition 5 with  $X_t^h := \ell(h, Z_t) - \mathbf{E}_{t-1}[\ell(h, Z_t)] = \ell(h, Z_t) - L(h)$ , where the last equality follows by Assumption 1. As before, we let  $S_n^h := \sum_{i=1}^n X_i^h$  and  $V_n^h := 1 + \sum_{i=1}^n (X_i^h)^2$ . By the classical bias-variance decomposition, we have

$$\mathbf{E}_{P(h)} [V_n^h] = n \widehat{V}_n(P) + \mathbf{E} [S_i^h]^2 / n, \quad (30)$$

where  $\widehat{V}_n(P)$  is as in the theorem's statement. Thus,

$$\frac{(\mathbf{E}_{P(h)} |S_n^h|)^2}{2(\rho+1) \mathbf{E}_{P(h)} [V_n^h] + 2 \mathbf{E}_{P(h)} |S_n^h|} \leq C_n(P) := \text{KL}(P \| P_0) + \ln \frac{\phi_\rho(n)}{\delta}, \quad (31)$$

holds only if,

$$\frac{\mathbf{E}_{P(h)} [S_n^h]^2}{2(\rho+1)n \widehat{V}_n(P) + 2(\rho+1) \mathbf{E}_{P(h)} [S_n^h]^2 / n + 2 |\mathbf{E}_{P(h)} [S_n^h]|} \leq C_n(P), \quad (32)$$

where we used the bias-variance decomposition in (30) together with the facts that  $|\mathbf{E}_{P(h)} [S_n^h]| \leq \mathbf{E}_{P(h)} [|S_n^h|]$  (Jensen's inequality) and that the function  $x \mapsto x^2/(x+v)$  is increasing on  $\mathbb{R}_{\geq 0}$  for all  $v > 0$ . On the other hand, (32) is true for  $P \in \mathcal{P}_n$ , only if,

$$|\mathbf{E}_{P(h)} [S_i^h]| \leq \frac{2C_n(P)/n + \sqrt{2(\rho+1)\widehat{V}_n(P) \cdot C_n(P)/n}}{1 - 2(\rho+1)C_n(P)/n}. \quad (33)$$

Thus, (31) holds only if (33) is true, and so we obtain the desired result by Proposition 5.  $\square$

## C Proofs of Monotonicity and Excess Risk Rates

To simplify notation in this section, we define

$$\widehat{L}_n(h) := \frac{1}{n} \sum_{i=1}^n \ell(h, Z_i), \quad \widehat{L}(Q) := \mathbf{E}_{Q(h)} [\widehat{L}_n(h)], \quad \text{for all } Q \in \Delta(\mathcal{H}).$$

We start by presenting a sequence of intermediate results needed in the proofs of Theorems 8 and 9.

### C.1 Intermediate Results

We now present a bound on the risk difference  $L(Q) - L(Q')$ , for any  $Q, Q' \in \Delta(\mathcal{H})$ , using our new time-uniform empirical Bernstein inequality in Theorem 6. For  $\delta \in (0, 1)$ ,  $\rho > 1$  and  $k \geq 1$ , we recall the definitions

$$\epsilon_k := \frac{2 \left( \text{KL}(\mathbf{B}(Z_{1:k}) \times P_{k-1} \| P_0 \times P_0) + \ln \frac{\phi_\rho(k)}{\delta} \right)}{k \cdot (\rho+1)^{-1}}; \quad n_\delta := \sup \left\{ n : 8(\rho+1) \ln \frac{\phi_\rho(n)}{\delta} > n \right\}, \quad (34)$$

where  $(P_k)$  are the outputs of Algorithm 1 and  $\phi_\rho$  is as in Proposition 5.

**Lemma 24.** Let  $\rho > 0$ ,  $P_0 \in \Delta(\mathcal{H})$ , and  $\mathcal{Q}_n$  be as in (8). Further, let  $\delta \in (0, 1)$  and  $n_\delta$  as in (34). Then, under Assumption 1, we have, with probability at least  $1 - \delta$ , for all  $n \geq n_\delta$  and  $Q, Q' \in \mathcal{Q}_n$ ,

$$L(Q) - L(Q') \leq \widehat{L}_n(Q) - \widehat{L}_n(Q') + \frac{\sqrt{\widehat{V}_n(Q, Q') \cdot \varepsilon_n(Q, Q')} + \frac{2\varepsilon_n(Q, Q')}{\rho+1}}{1 - \varepsilon_n(Q, Q')},$$

$$\text{where } \varepsilon_k(Q, Q') := \frac{2(\rho+1)(\text{KL}(Q \times Q' \| P_0 \times P_0) + \ln \frac{\phi_\rho(k)}{\delta})}{k} \quad \text{and} \quad (35)$$

$$\widehat{V}_k(Q, Q') := \frac{1}{k} \sum_{t=1}^k \mathbf{E}_{Q_k(h, h')} \left[ (\ell(h, Z_t) - \ell(h', Z_t))^2 \right] - \left( \frac{1}{k} \sum_{t=1}^k \mathbf{E}_{Q_k(h, h')} [\ell(h, Z_t) - \ell(h', Z_t)] \right)^2.$$

**Proof of Lemma 24.** The proof follows by our new time-uniform concentration inequality in Theorem 6 with the function  $f : \mathcal{H}^2 \times \mathcal{Z} \rightarrow [0, 1]$  defined by

$$f((h, h'), z) = (\ell(h, z) - \ell(h', z) + 1) / 2.$$

Theorem 6 implies that, for any  $\delta \in (0, 1)$ , with probability at least  $1 - \delta$ ,

$$\mathbf{E}_{Q(h), Q'(h')} [L(h) - L(h') + 1] / 2 \leq \frac{1}{n} \sum_{i=1}^n \mathbf{E}_{Q(h), Q'(h')} [f((h, h'), Z_i)] + \frac{\sqrt{\widehat{V}_n \varepsilon_n} + \frac{\varepsilon_n}{\rho+1}}{1 - \varepsilon_n}, \quad (36)$$

for all  $n \geq n_\delta$  and  $Q, Q' \in \mathcal{Q}_n$ , where  $\varepsilon_n = \varepsilon_n(Q, Q')$  and  $\widehat{V}_n$  is given by:

$$\begin{aligned} \widehat{V}_n &= \frac{1}{n} \sum_{t=1}^n \mathbf{E}_{Q(h), Q'(h')} \left[ \left( f((h, h'), Z_t) - \frac{1}{n} \sum_{i=1}^n \mathbf{E}_{Q(\tilde{h}), Q'(\tilde{h}')} [f((\tilde{h}, \tilde{h}'), Z_i)] \right)^2 \right], \\ &= \frac{1}{4n} \sum_{t=1}^n \mathbf{E}_{Q(h), Q'(h')} \left[ \left( \ell(h, Z_t) - \ell(h', Z_t) - \frac{1}{n} \sum_{i=1}^n \mathbf{E}_{Q(\tilde{h}), Q'(\tilde{h}')} [\ell(\tilde{h}, Z_i) - \ell(\tilde{h}', Z_i)] \right)^2 \right], \\ &= \frac{1}{4n} \sum_{t=1}^n \mathbf{E}_{Q(h), Q'(h')} \left[ (\ell(h, Z_t) - \ell(h', Z_t))^2 \right] - \left( \frac{1}{2n} \sum_{t=1}^n \mathbf{E}_{Q(h), Q'(h')} [\ell(h, Z_t) - \ell(h', Z_t)] \right)^2. \end{aligned}$$

Plugging this into (36) and multiplying the resulting inequality by 2, leads to the desired inequality.  $\square$

Lemma 24 leads to the following corollary that will be useful for our excess risk rates:

**Corollary 25.** Let  $\rho > 0$ ,  $P_0 \in \Delta(\mathcal{H})$ , and  $\mathcal{Q}_n$  be as in (8). Under Assumption 1, we have for  $\delta \in (0, 1)$  and  $n_\delta$  as in (34), with probability at least  $1 - \delta$ ,

$$L(Q) - L(Q') \leq \widehat{L}_n(Q) - \widehat{L}_n(Q') + 2\sqrt{\frac{\sum_{i=1}^n \mathbf{E}_{Q(h), Q'(h')} [(\ell(h, Z_i) - \ell(h', Z_i))^2] \cdot \varepsilon_n}{n}} + \frac{4\varepsilon_n}{\rho+1},$$

for all  $n \geq n_\delta$  and  $Q, Q' \in \mathcal{Q}_n$ , where  $\varepsilon_k := \frac{2(\rho+1)}{k} \left( \text{KL}(Q \times Q' \| P_0 \times P_0) + \ln \frac{\phi_\rho(k)}{\delta} \right)$ .

**Proof of Corollary 25.** Let  $\varepsilon_n(Q, Q')$  and  $\widehat{V}_n(Q, Q')$  be as in Lemma 24. The corollary follows by Lemma 24 and the facts that  $1 - \varepsilon_n(Q, Q') \geq 1/2$ , for all  $n \geq n_\delta$  and  $Q, Q' \in \mathcal{Q}_n$ ; and

$$\widehat{V}_n(Q, Q') \leq \frac{1}{k} \sum_{t=1}^k \mathbf{E}_{Q_k(h, h')} \left[ (\ell(h, Z_t) - \ell(h', Z_t))^2 \right].$$

$\square$

The next lemma provides a way of bounding the square-root term in the previous corollary under the Bernstein condition (Definition 3):

**Lemma 26.** Let  $B > 1$  and  $\beta \in [0, 1]$ , and suppose that the  $(\beta, B)$ -Bernstein condition holds. Further, let  $\rho > 1$ ,  $\delta \in (0, 1)$ , and  $\varepsilon_k(Q, Q')$  be as in (35), for  $Q, Q' \in \Delta(\mathcal{H})$ . Then, under Assumptions 1 and 2, there exists a universal constant  $C > 0$  s.t. with probability at least  $1 - \delta$ ,

$$\sqrt{\frac{\sum_{i=1}^n \mathbf{E}_{Q(h)}[(\ell(h, Z_i) - \ell(h_*, Z_i))^2] \cdot \varepsilon_n(Q, Q')}{2^{-5}n}} \leq \frac{L(Q) - L(h_*)}{2} + C \max_{\beta' \in \{\beta, 1\}} \varepsilon_n(Q, Q')^{\frac{1}{2-\beta'}}, \quad (37)$$

for all  $n \geq 1$  and  $Q, Q' \in \Delta(\mathcal{H})$ , where  $h_* \in \arg \inf_{h \in \mathcal{H}} L(h)$ .

**Proof of Lemma 26.** Applying the fact that  $\sqrt{xy} \leq (\nu x + y/\nu)/2$ , for all  $\nu > 0$ , to the LHS of (37) with

$$\nu = \frac{\eta}{8}, \quad x = \frac{1}{n} \sum_{i=1}^n \mathbf{E}_{Q(h)}[(\ell(h, Z_i) - \ell(h_*, Z_i))^2], \quad \text{and} \quad y = 2^5 \varepsilon_n(Q, Q'),$$

which leads to, for all  $\eta > 0$ , and  $k = 2^5$ ,

$$\begin{aligned} r_n(Q) &:= \sqrt{\frac{k \sum_{i=1}^n \mathbf{E}_{Q(h)}[(\ell(h, Z_i) - \ell(h_*, Z_i))^2] \cdot \varepsilon_n(Q, Q')}{n}}, \\ &\leq \frac{\eta}{16n} \sum_{i=1}^n \mathbf{E}_{Q(h)}[(\ell(h, Z_i) - \ell(h_*, Z_i))^2] + \frac{4k\varepsilon_n(Q, Q')}{\eta}. \end{aligned} \quad (38)$$

Now, let  $C_\beta := ((1-\beta)^{1-\beta} \beta^\beta)^{\frac{\beta}{1-\beta}} + 3/2(2B)^{\frac{1}{1-\beta}}$ . By combining (38) and Lemma 19, we get, for any  $\delta \in (0, 1)$  and  $\eta \in [0, 1/2]$ , with probability at least  $1 - \delta$ ,

$$\begin{aligned} \forall Q \in \Delta(\mathcal{H}), \forall n \geq 1, \quad r_n(Q) &\leq (L(Q) - L(h_*))/2 + C_\beta \cdot \eta^{\frac{1}{1-\beta}}/4 \\ &\quad + \frac{\text{KL}(Q \| P_0) + \ln \delta^{-1}}{2n\eta} + \frac{4k\varepsilon_n(Q, Q')}{\eta}, \\ &\leq (L(Q) - L(h_*))/2 + C_\beta \cdot \eta^{\frac{1}{1-\beta}}/4 + \frac{(4k+1/4)\varepsilon_n(Q, Q')}{\eta}. \end{aligned} \quad (39)$$

Now, minimizing the RHS of (39) over  $\eta \in (0, 1/2)$  and invoking Lemma 20, we get, for any  $\delta \in (0, 1)$ , with probability at least  $1 - \delta$ ,

$$\begin{aligned} \forall Q \in \Delta(Q), \forall n \geq 1, \quad r_n(Q) &\leq \frac{L(Q) - L(h_*)}{2} + 2(16k+1/2)\varepsilon_n(Q, Q') \\ &\quad + \frac{C_\beta \cdot (3-2\beta)}{4(1-\beta)} \left( \frac{4(1-\beta)(4k+1/4)\varepsilon_n(Q, Q')}{C_\beta} \right)^{\frac{1}{2-\beta}}, \\ &\leq \frac{L(Q) - L(h_*)}{2} + 2(4k+1/4)\varepsilon_n(Q, Q') \\ &\quad + \frac{C_\beta^{\frac{1-\beta}{2-\beta}} \cdot (3-2\beta)}{4(1-\beta)} (4(1-\beta)(4k+1/4)\varepsilon_n(Q, Q'))^{\frac{1}{2-\beta}}. \end{aligned} \quad (40)$$

Combining (40) with the fact that  $\beta \mapsto C_\beta^{\frac{1-\beta}{2-\beta}}$  is bounded in  $[0, 1]$ , we get the desired result.  $\square$

We now move on to the proofs of the main results of Section 4.

## C.2 Proofs of Theorems 8 and 9

Let  $(\xi_k)$  and  $n_\delta$  be as in (9) and (34), respectively. Further, it will be useful to define the event

$$\mathcal{E} := \left\{ \forall n \geq n_\delta, \quad L(\tilde{P}_n) - L(P_{n-1}) \leq \widehat{L}_n(\tilde{P}_n) - \widehat{L}_n(P_{n-1}) + \xi_n \right\}, \quad (41)$$

where  $\tilde{P}_k := \mathbf{B}(Z_{1:k})$  and  $(P_k)$  are as in Algorithm 1 with the choice of  $(\xi_k)$  in (9). Observe that by Lemma 24, we have  $\mathbf{P}[\mathcal{E}] \geq 1 - \delta$ , under Assumptions 1 and 2. We begin by the proof of risk-monotonicity:

**Proof of Theorem 8.** Let  $\Delta_n := L(P_n) - L(P_{n-1})$ . Using the definitions of  $\mathcal{E}$  and  $(\xi_k)$  as in (41) and (9), respectively, we have

$$\begin{aligned}\Delta_n &= (L(\tilde{P}_n) - L(P_{n-1})) \cdot \mathbb{I}\{P_n \neq P_{n-1}\} + (L(P_n) - L(P_{n-1})) \cdot \mathbb{I}\{P_n \equiv P_{n-1}\}, \\ &= (L(\tilde{P}_n) - L(P_{n-1})) \cdot \mathbb{I}\{P_n \neq P_{n-1}\}.\end{aligned}\quad (42)$$

Now, when  $P_n \neq P_{n-1}$ , Line 2 of Algorithm 1 implies that

$$\widehat{L}_n(\tilde{P}_n) \leq \widehat{L}_n(P_{n-1}) - \xi_n. \quad (43)$$

Using this and (42), we have that under the event  $\mathcal{E}$ ,

$$\forall n \geq n_\delta, \quad L(\tilde{P}_n) - L(P_{n-1}) \leq \widehat{L}_n(\tilde{P}_n) - \widehat{L}_n(P_{n-1}) + \xi_n \leq 0.$$

This, combined with the fact that  $\mathbf{P}[\mathcal{E}] \geq 1 - \delta$  (Lemma 24) completes the proof.  $\square$

**Proof of Theorem 9.** Let  $\tilde{P}_k := \mathbf{B}(Z_{1:k})$  and  $(P_k)$  be as in Algorithm 1 with the choice of  $(\xi_k)$  in (9). Further, we let  $\epsilon_n$  be as in (9) and

$$\xi'_k := 2\sqrt{\frac{\sum_{i=1}^n \mathbf{E}_{\tilde{P}_k(h), P_{k-1}(h')} [(\ell(h, Z_i) - \ell(h', Z_i))^2] \cdot \epsilon_k}{k}} + \frac{4\epsilon_k}{\rho + 1}. \quad (44)$$

It will be convenient to also consider the events:

$$\begin{aligned}\mathcal{E} &:= \{\forall n \geq n_\delta, \quad L(\tilde{P}_n) - L(P_{n-1}) \leq \widehat{L}_n(\tilde{P}_n) - \widehat{L}_n(P_{n-1}) + \xi'_n\}, \\ \mathcal{E}' &:= \left\{ \forall n \geq 1, \quad Q, Q' \in \Delta(\mathcal{H}), \quad \sqrt{\frac{\sum_{i=1}^n \mathbf{E}_{Q(h)} [(\ell(h, Z_i) - \ell(h_*, Z_i))^2] \cdot \epsilon_n(Q, Q')}{2^{-5}n}} \leq \frac{L(Q) - L(h_*)}{2} + C \cdot \left( \epsilon_n(Q, Q')^{\frac{1}{2-\beta}} + \epsilon_n(Q, Q') \right) \right\},\end{aligned}$$

where  $C$  and  $\epsilon_n(Q, Q')$  are as in Lemma 26. We note that by Corollary 25 and Lemma 26, we have

$$\mathbf{P}[\mathcal{E}] \wedge \mathbf{P}[\mathcal{E}'] \geq 1 - \delta. \quad (45)$$

For the rest of this proof, we will assume the event  $\mathcal{E} \cap \mathcal{E}'$  holds, and let  $n \geq n_\delta$  throughout. We consider two cases pertaining to the condition in Line 2 of Algorithm 1.

**Case 1.** Suppose that the condition in Line 2 of Algorithm 1 is satisfied for  $k = n$ . In this case, we have

$$L(P_n) - L(h_*) = L(\tilde{P}_n) - L(h_*) \quad (46)$$

**Case 2.** Now suppose the condition in Line 2 does not hold for  $k = n$ . This means that  $P_n \equiv P_{n-1}$ , and so

$$\widehat{L}_n(P_n) - \widehat{L}_n(\tilde{P}_n) \leq \xi_n \leq \xi'_n, \quad (47)$$

where the last inequality follows by the fact that  $1 - \epsilon_n \geq 1/2$ , for all  $n \geq n_\delta$  under Assumption 2. Thus, by the assumption that  $\mathcal{E}'$  is true, we have,

$$\begin{aligned}L(P_n) &= L(\tilde{P}_n) + (L(P_n) - L(\tilde{P}_n)), \\ &\leq L(\tilde{P}_n) + \widehat{L}_n(P_n) - \widehat{L}_n(\tilde{P}_n) + \xi'_n, && (\mathcal{E} \text{ is true}) \\ &\leq L(\tilde{P}_n) + 2\xi'_n, && (\text{by (47)}) \\ &= L(\tilde{h}_n) + 4\sqrt{\frac{\sum_{i=1}^n \mathbf{E}_{\tilde{P}_n(h), P_{n-1}(h)} [(\ell(h, Z_i) - \ell(h, Z_i))^2] \cdot \epsilon_n}{n}} + \frac{8\epsilon_n}{\rho + 1}, \\ &= L(\tilde{P}_n) + 4\sqrt{\frac{\sum_{i=1}^n \mathbf{E}_{\tilde{P}_n(h), P_n(h')} [(\ell(h, Z_i) - \ell(h', Z_i))^2] \cdot \epsilon_n}{n}} + \frac{8\epsilon_n}{\rho + 1}, && (P_n \equiv P_{n-1}) \\ &\leq L(\tilde{P}_n) + 4\sqrt{\frac{2 \sum_{i=1}^n \mathbf{E}_{\tilde{P}_n(h)} [(\ell(h, Z_i) - \ell(h_*, Z_i))^2] \cdot \epsilon_n}{n}} + \frac{8\epsilon_n}{\rho + 1} \\ &\quad + 4\sqrt{\frac{2 \sum_{i=1}^n \mathbf{E}_{P_n(h)} [(\ell(h, Z_i) - \ell(h_*, Z_i))^2] \cdot \epsilon_n}{n}},\end{aligned}\quad (48)$$



where to obtain the last inequality, we used the fact that  $(a - c)^2 \leq 2(a - b)^2 + 2(b - c)^2$  and  $\sqrt{a + b} \leq \sqrt{a} + \sqrt{b}$  for all  $a, b, c \in \mathbb{R}_{\geq 0}$ . Now, by (48), the fact that  $\mathcal{E}'$  holds, and Assumption 2 (which implies that  $\epsilon_n^{\frac{1}{2-\beta}} \leq O(\epsilon_n)$  for  $n \geq n_\delta$ ), we have

$$L(P_n) - L(h_\star) \leq L(\tilde{P}_n) - L(h_\star) + \frac{L(\tilde{P}_n) - L(h_\star)}{2} + \frac{L(P_n) - L(h_\star)}{2} + O(\epsilon_n)^{\frac{1}{2-\beta}},$$

which, after re-arranging, becomes

$$\frac{L(P_n) - L(h_\star)}{2} \leq \frac{3(L(\tilde{P}_n) - L(h_\star))}{2} + O(\epsilon_n)^{\frac{1}{2-\beta}}. \quad (49)$$

Multiplying on both sides by 2 and using (45) with a union bound leads to the desired result.  $\square$

### C.3 Additional Results and Proofs

Using the lemmas in Section C.1, we derive the excess-risk rate of ERM under the Bernstein condition:

**Lemma 27.** *Let  $B > 1$ ,  $\beta \in [0, 1]$  and suppose that the  $(\beta, B)$ -Bernstein condition holds and  $\mathcal{H}$  is finite. Further, let  $\rho > 1$ ,  $\delta \in (0, 1)$ , and  $n_\delta$  be as in (34). Then, under Assumptions 1 and 2, the ERM  $\hat{h}_n \in \arg \min_{h \in \mathcal{H}} \frac{1}{n} \sum_{t=1}^n \ell(h, Z_t)$  satisfies, with probability at least  $1 - \delta$ ,*

$$L(\hat{h}_n) - L(h_\star) \leq O\left(\frac{\ln(\ln(n|\mathcal{H}|/\delta))}{n}\right)^{\frac{1}{2-\beta}} + \frac{\ln(\ln(n|\mathcal{H}|/\delta))}{n}, \quad (50)$$

for all  $n \geq n_\delta \vee (16(\rho + 1) \ln |\mathcal{H}|)$ .

**Proof of Lemma 27.** Let  $n_\delta$  be as in (34) and define

$$\epsilon_k := \frac{2(\rho + 1) \left(2 \ln |\mathcal{H}| + \ln \frac{\phi_\rho(k)}{\delta}\right)}{k}, \quad \text{and} \quad \xi'_n := 2\sqrt{\frac{\sum_{i=1}^n (\ell(\hat{h}_n, Z_i) - \ell(h_\star, Z_i))^2 \cdot \epsilon_n}{n}} + \frac{4\epsilon_n}{\rho + 1}.$$

Further, consider the events

$$\begin{aligned} \mathcal{E} &:= \left\{ \forall n \geq n_\delta, L(\hat{h}_n) - L(h_\star) \leq \widehat{L}_n(\hat{h}_n) - \widehat{L}_n(h_\star) + \xi'_n \right\}, \\ \mathcal{E}' &:= \left\{ \forall n \geq 1, \sqrt{\frac{\sum_{i=1}^n (\ell(\hat{h}_n, Z_i) - \ell(h_\star, Z_i))^2 \cdot \epsilon_n}{2^{-5n}}} \leq \frac{L(\hat{h}_n) - L(h_\star)}{2} + C \cdot \left( \epsilon_n^{\frac{1}{2-\beta}} + \epsilon_n \right) \right\}, \end{aligned}$$

where  $C$  is as in Lemma 26. By Corollary 25 and Lemma 26, instantiated with  $P_0$  equal to the uniform prior over  $\mathcal{H}$  and  $Q$  [resp.  $Q'$ ] equal to the Dirac at  $\hat{h}_n$  [resp.  $h_\star$ ], we have

$$\min(\mathbf{P}[\mathcal{E}], \mathbf{P}[\mathcal{E}']) \geq 1 - \delta. \quad (51)$$

For the rest of this proof, we will assume that the event  $\mathcal{E} \cap \mathcal{E}'$  holds, and let  $n \geq n_\delta$ . By the assumption that  $\mathcal{E}$  holds, we have

$$\begin{aligned} L(\hat{h}_n) &= L(h_\star) + (L(\hat{h}_n) - L(h_\star)), \\ &\leq L(h_\star) + \widehat{L}_n(\hat{h}_n) - \widehat{L}_n(h_\star) + \xi'_n, && (\mathcal{E} \text{ is true}) \\ &\leq L(h_\star) + \xi'_n, && (\hat{h}_n \text{ is the ERM}) \\ &= L(h_\star) + 2\sqrt{\frac{\sum_{i=1}^n (\ell(\hat{h}_n, Z_i) - \ell(h_\star, Z_i))^2 \cdot \epsilon_n}{n}} + 4\epsilon_n. \end{aligned} \quad (52)$$

Now by the assumption that  $\mathcal{E}'$  holds, we can bound the middle term on the RHS of (52), leading to

$$\begin{aligned} L(\hat{h}_n) &= L(h_\star) + \frac{L(\hat{h}_n) - L(h_\star)}{2} + O\left(\max_{\beta' \in \{1, \beta\}} \left(\frac{\ln(n|\mathcal{H}|/\delta)}{n}\right)^{\frac{1}{2-\beta'}}\right) + 4\epsilon_n, \\ &= L(h_\star) + \frac{L(\hat{h}_n) - L(h_\star)}{2} + O\left(\frac{\ln(n|\mathcal{H}|/\delta)}{n}\right)^{\frac{1}{2-\beta}}, \end{aligned} \quad (53)$$

for all  $n \geq n_\delta \vee (16(\rho + 1) \ln |\mathcal{H}|)$ , where in the last inequality we used the definition of  $\epsilon_n$ . Combining (53) with (51), and applying a union bound, we obtain the desired result.  $\square$

**Proof of Theorem 11.** First, note that by linearity of the expectation it suffices to show that

$$\mathbf{E}[L(P_n) - L(P_{n-1})] \leq 0,$$

where the expectation is over the randomness of the samples  $Z_{1:n}$ . Moving forward, we let  $\Delta_n := L(P_n) - L(P_{n-1})$ , and for  $n \geq N$ , define the event

$$\mathcal{E}_n := \{L(\tilde{P}_n) - L(P_{n-1}) \leq \widehat{L}_n(\tilde{P}_n) - \widehat{L}_n(P_{n-1}) + \xi'_n\}, \quad (54)$$

where  $\tilde{P}_k := \mathbf{B}(Z_{1:k})$  and  $(P_k)$  as in Algorithm 1 with the choice of  $(\xi'_k)$  in the theorem's statement. Observe that by Lemma 24, we have  $\mathbf{P}[\mathcal{E}_n] \geq 1 - 1/n^b$  for all  $n \geq N$ , under Assumptions 1 and 2.

Now, by the law of the total expectation, we have

$$\begin{aligned} \mathbf{E}[\Delta_n] &= \mathbf{P}[\mathcal{E}_n] \cdot \mathbf{E}[\Delta_n | \mathcal{E}_n] + \mathbf{P}[\mathcal{E}_n^c] \cdot \mathbf{E}[\Delta_n | \mathcal{E}_n^c], \\ &\leq \mathbf{P}[\mathcal{E}_n] \cdot \mathbf{E}[\Delta_n | \mathcal{E}_n] + 1/n^b. \end{aligned}$$

where the last inequality follows by the fact that the loss  $\ell$  takes values in  $[0, 1]$  and that  $\mathbf{P}[\mathcal{E}_n^c] \leq 1/n^b$ . By applying the law of the total expectation again, we obtain

$$\begin{aligned} \mathbf{E}[\Delta_n] &= \mathbf{P}[\{P_n \equiv P_{n-1}\} \cap \mathcal{E}_n] \cdot \mathbf{E}[\Delta_n | \{P_n \equiv P_{n-1}\} \cap \mathcal{E}_n] \\ &\quad + \mathbf{P}[\{P_n \not\equiv P_{n-1}\} \cap \mathcal{E}_n] \cdot \mathbf{E}[\Delta_n | \{P_n \not\equiv P_{n-1}\} \cap \mathcal{E}_n] + 1/n^b, \\ &\leq \mathbf{P}[\{P_n \not\equiv P_{n-1}\} \cap \mathcal{E}_n] \cdot \mathbf{E}[\Delta_n | \{P_n \not\equiv P_{n-1}\} \cap \mathcal{E}_n] + 1/n^b, \end{aligned} \quad (55)$$

where the last inequality follows by the fact that if  $P_n \equiv P_{n-1}$ , then  $\Delta_n = 0$ . Now, if  $P_n \not\equiv P_{n-1}$ , then by Line 2 of Algorithm 1, we have

$$\widehat{L}_n(P_n) = \widehat{L}_n(\tilde{P}_n) \leq \widehat{L}_n(P_{n-1}) - \xi'_n, \quad (56)$$

Under the event  $\mathcal{E}_n$ , we have

$$L(\tilde{P}_n) - L(P_{n-1}) \leq \widehat{L}_n(\tilde{P}_n) - \widehat{L}_n(P_{n-1}) + \xi'_n.$$

This, in combination with (56), implies that under the event  $\mathcal{E}_n \cap \{P_n \not\equiv P_{n-1}\}$ ,

$$\Delta_n = L(\tilde{P}_n) - L(P_{n-1}) \leq -\xi'_n + \xi'_n = 0.$$

As a result, we have

$$\mathbf{E}[\Delta_n | \{P_n \not\equiv P_{n-1}\} \cap \mathcal{E}_n] \leq 0. \quad (57)$$

Combining (55) and (57) yields the desired result.  $\square$

**Proof of Proposition 10.** The risk monotonicity claim follows from Theorem 8, and the excess risk rate follows from Theorem 9 and Lemma 27.  $\square$

## D Risk Monotonicity without PAC-Bayes

In this section, we show how risk monotonicity can be achieved in the i.i.d. setting without Assumption 2. For this, we will use a concentration inequality due to [35] that has an empirical variance term under the square root just like ours in Theorem 6. To present this inequality, we first present some new notation. For any  $Z_{1:n} \in \mathcal{Z}^n$ , we let  $\ell \circ \mathcal{H}(Z_{1:n}) := (\ell(h, Z_1), \dots, \ell(h, Z_n))$ . Further, for any subset  $\mathcal{A} \subset \mathbb{R}^n$  and  $\epsilon > 0$ , we let  $\mathcal{N}(\epsilon, \mathcal{A}, \|\cdot\|_\infty)$  be the cardinality of smallest subset  $\mathcal{A}_0 \subseteq \mathcal{A}$  such that  $\mathcal{A}$  is contained in the union of  $\|\cdot\|_\infty$ -balls of radii  $\epsilon$  centered at points in  $\mathcal{A}_0$ . Finally, we consider the following complexity measure:

$$\mathcal{N}_\infty(\epsilon, \ell \circ \mathcal{H}, n) := \sup_{Z_{1:n} \in \mathcal{Z}^n} \mathcal{N}(\epsilon, \ell \circ \mathcal{H}(Z_{1:n}), \|\cdot\|_\infty). \quad (58)$$

With this, we state the concentration inequality due to [35] that we will need:

**Theorem 28.** *Let  $Z$  be a random variable with values in a set  $\mathcal{Z}$  with distribution  $\pi$ , and let  $\mathcal{H}$  be a set of hypotheses. Further, let  $\delta \in (0, 1)$ ,  $n \geq 16$ , and set*

$$\mathcal{M}(n) := 10\mathcal{N}_\infty(1/n, \ell \circ \mathcal{H}, 2n).$$

*Then, with probability at least  $1 - 2\delta$  in the random vector  $Z_{1:n} \sim \pi^n$ , we have*

$$\forall h \in \mathcal{H}, \quad \left| \mathbf{E}[\ell(h, Z)] - \frac{1}{n} \sum_{i=1}^n \ell(h, Z_i) \right| \leq \sqrt{\frac{18V_n \ln(\mathcal{M}(n)/\delta)}{n}} + \frac{15 \ln(\mathcal{M}(n)/\delta)}{n-1},$$

where  $V_n := V_n(\ell \circ \mathcal{H}, Z_{1:n}) := \frac{1}{n(n-1)} \sum_{1 \leq i < j \leq n} (\ell(h, Z_i) - \ell(h, Z_j))^2$ .

---

**Algorithm 2** A Deterministic Risk Monotonic Algorithm Wrapper
 

---

**Require:** A base learning algorithm  $\hat{h} : \cup_{i=1}^{\infty} \mathcal{Z}^i \rightarrow \mathcal{H}$ .

Initial hypothesis  $\hat{h}_0 \in \mathcal{H}$ .

Samples  $Z_1, \dots, Z_n$ .

1: **for**  $k = 1, \dots, n$  **do**

2:   Set  $\widehat{V}_k := \frac{1}{k(k-1)} \sum_{1 \leq i < j \leq k} (\ell(h(Z_{1:k}), Z_i) - \ell(\hat{h}_{k-1}, Z_i) - \ell(h(Z_{1:k}), Z_j) + \ell(\hat{h}_{k-1}, Z_j))^2$ .

3:   Set  $\xi_k = \sqrt{\frac{18\widehat{V}_k \ln(\mathcal{M}(k)/k)}{k}} + \frac{30 \ln(\mathcal{M}(k)/k)}{k-1}$ .

4:   **if**  $\frac{1}{k} \sum_{i=1}^k \ell(\hat{h}(Z_{1:k}), Z_i) - \frac{1}{k} \sum_{i=1}^k \ell(\hat{h}_{k-1}, Z_i) \leq -\xi_k$  **then**

5:     Set  $\hat{h}_k = \hat{h}(Z_{1:k})$ .

6:   **else**

7:     Set  $\hat{h}_k = \hat{h}_{k-1}$ .

8: **Return**  $\hat{h}_n$ .

---

Using Theorem 28 and following the same steps in the proof of Theorem 11, it follows that Algorithm 2 is risk monotonic in expectation (up to an additive  $2/k$  term) for all sample sizes. Furthermore, since the concentration inequality in Theorem 28 has an empirical variance term under the square-root (just like ours in Theorem 6), the risk decomposition in our Theorem 9 also holds for Algorithm 2, albeit with probability at least  $1 - O(1/n)$  for sample size  $n$ .
